# Supplementary material
Source: MDPI journal article supplement (https://www.mdpi.com/2073-4441/13/15/1994)
Supplement: s1 [file s1]

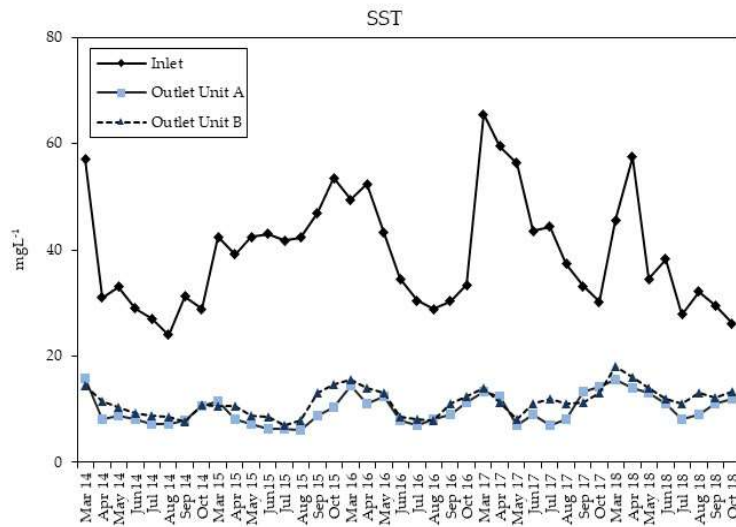

**Figure S1(a).** Total suspended solids concentrations on different dates (2014-2018).

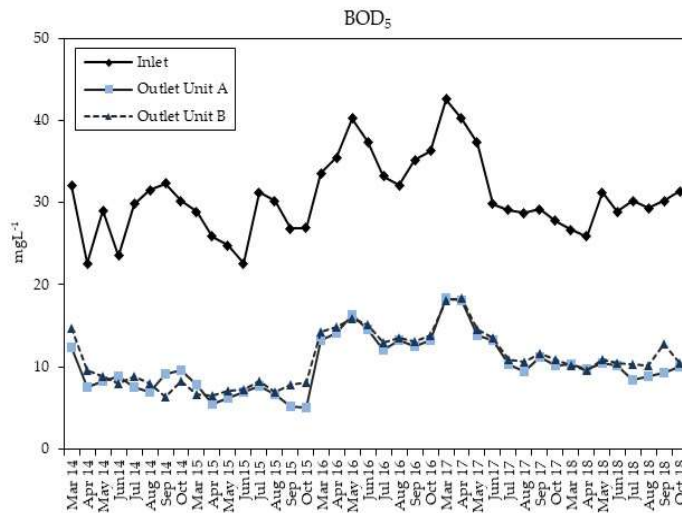

**Figure S1(b).** Biochemical oxygen demand (five days) concentrations on different dates (2014-2018).

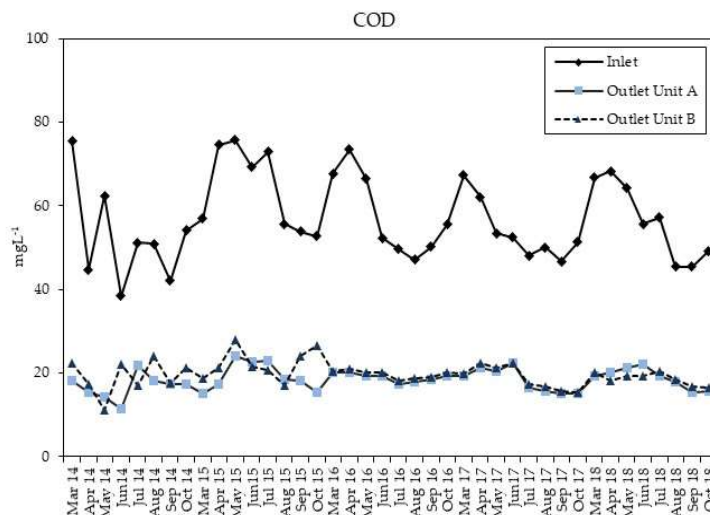

**Figure S1(c).** Chemical oxygen demand concentrations on different dates (2014-2018).

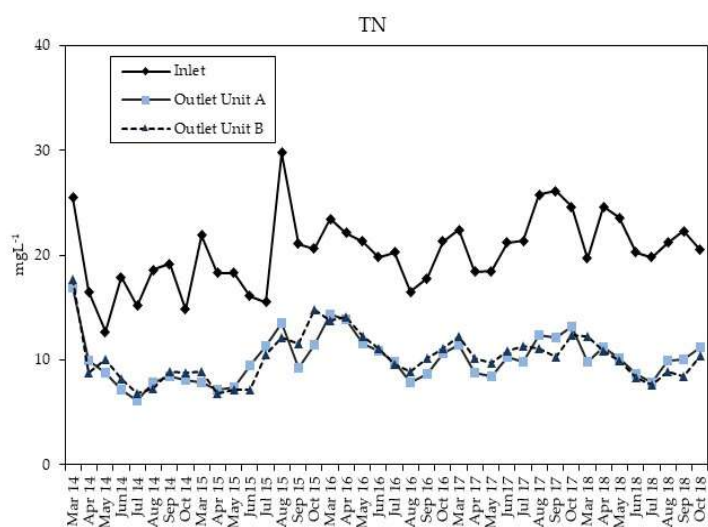

Figure S1(d). Total nitrogen concentrations on different dates (2014-2018).

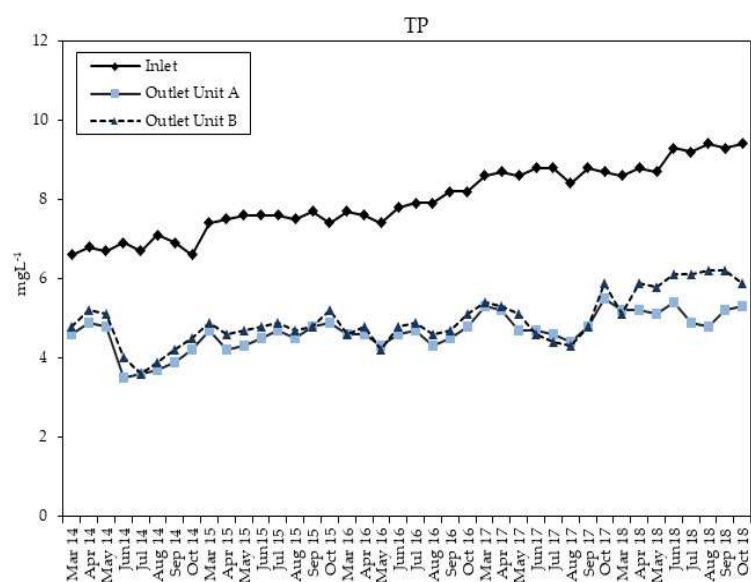

Figure S1(e). Total phosphorus concentrations on different dates (2014-2018).

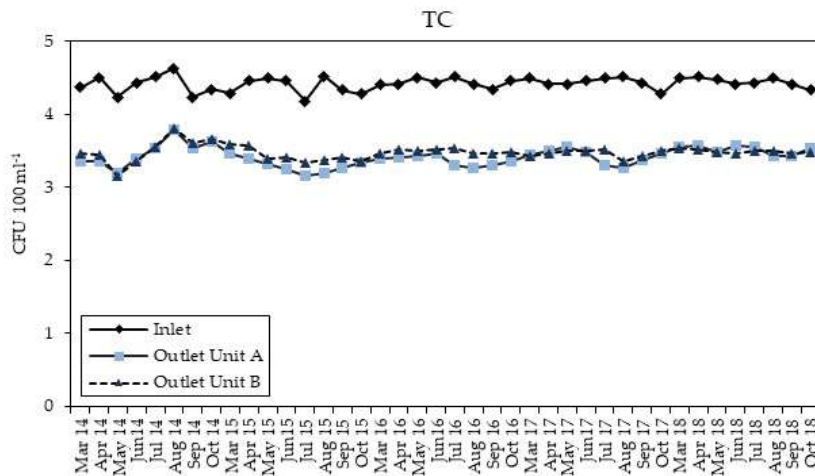

Figure S2(a). Total coliforms concentrations on different dates (2014-2018).

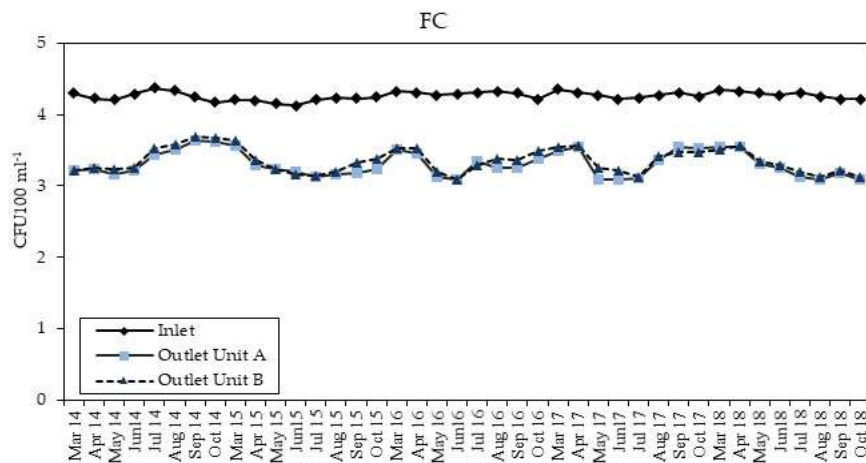

Figure S2(b). Faecal coliforms concentrations on different dates (2014-2018).

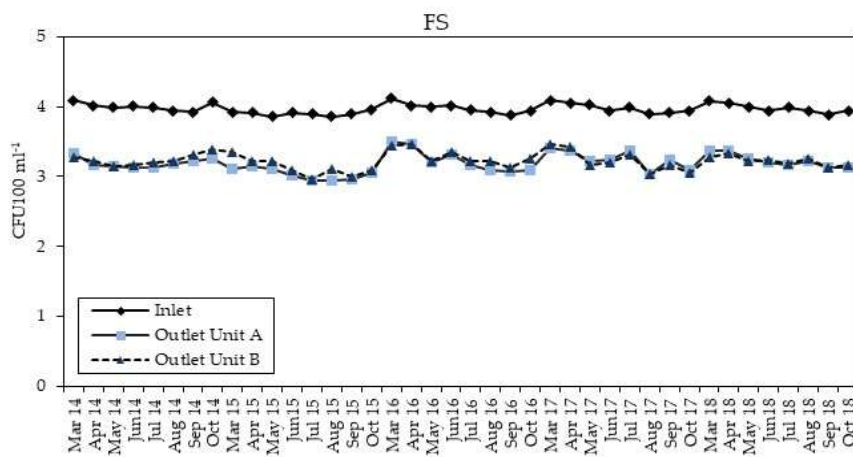

Figure S2(c). Faecal streptococci concentrations on different dates (2014-2018).

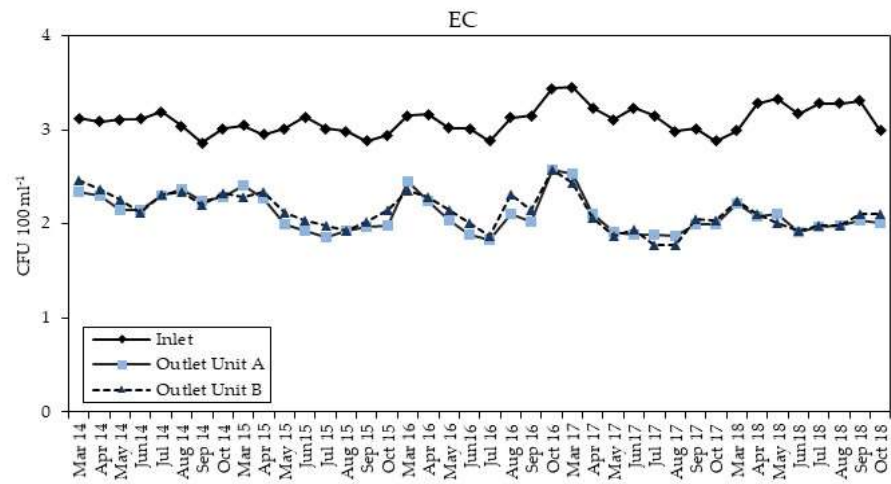

**Figure S2(d).** *Escherichia coli* concentrations on different dates (2014-2018).
